# Supplementary material for: Environmental Factors Modulate the Role of orf21 Sigma Factor in Clavulanic Acid Production in Streptomyces Clavuligerus ATCC27064
Source: MDPI journal article supplement (doi:10.3390/bioengineering9020078), 2022-02-16
Supplement: s1 [file s1]

# Environmental Factors Modulate the Role of *orf21* Sigma Factor in Clavulanic Acid Production in *Streptomyces Clavuligerus* ATCC27064

Luisa F. Patiño, Vanessa Aguirre-Hoyos, Laura I. Pinilla, León F. Toro and Rigoberto Ríos-Esteba\*

**Supplementary Table S1.** Bacterial strains and plasmids used in this study

| Strain/plasmid                                 | Description                                                                                                                                                                                                              | Source or reference                                                                 |
|------------------------------------------------|--------------------------------------------------------------------------------------------------------------------------------------------------------------------------------------------------------------------------|-------------------------------------------------------------------------------------|
| Bacterial strains                              |                                                                                                                                                                                                                          |                                                                                     |
| <i>S. clavuligerus</i> ATCC 27064              | Wild-type, CA and cephamycin producer.                                                                                                                                                                                   | Kindly provided by the institute INBIOTEC at Leon University (Spain).               |
| <i>S. clavuligerus</i> /pIORF21                | <i>orf21</i> overexpressed in wild type <i>S. clavuligerus</i> .                                                                                                                                                         | This study                                                                          |
| <i>S. clavuligerus</i> /pIB139                 | pIB139 without gene insert integrated into <i>S. clavuligerus</i> ATCC27064 (control strain).                                                                                                                            | This study                                                                          |
| <i>Escherichia coli</i> DH5                    | <i>F</i> - 80 <i>lacZ</i> Δ <i>M15</i> Δ( <i>lacZYA-argF</i> ) <i>U169 recA1 endA1 hsdR17</i> ( <i>r<sub>k</sub></i> -, <i>m<sub>k</sub></i> +) <i>phoA supE44</i> - <i>thi-1 gyrA96 relA1</i>                           | General culture collection. Bioprocess group at University of Antioquia (Colombia). |
| <i>Escherichia coli</i> DSM11539 (Migula 1985) | GM48Sm <sup>F</sup> ( <i>thr leu thi lacY galK galT ara tonA tsx supE44</i> ), Δ <i>talacproF1 traD36 proAB lacIQZ</i> Δ <i>M15</i> , λ <sup>-</sup><br>Note: the strain has lost its <i>dam</i> and <i>dcm</i> markers. | DSMZ                                                                                |
| Plasmids                                       |                                                                                                                                                                                                                          |                                                                                     |
| pTZ57R                                         | <i>E. coli</i> general cloning vector, Amp <sup>r</sup> .                                                                                                                                                                | Thermo Fisher Scientific, USA                                                       |
| pTZ57R/ <i>orf21</i>                           | pTZ57R with <i>S. clavuligerus orf21</i> gene including <i>XbaI</i> - <i>NdeI</i> recognition sites.                                                                                                                     | This study                                                                          |
| pIB139                                         | φC31 int and attP; <i>aac(3)IV</i> (apramycin); <i>ermE*</i> promoter.                                                                                                                                                   | Kindly provided by the institute INBIOTEC at Leon University (Spain) [1].           |
| pIORF21                                        | pIB139 with <i>S. clavuligerus orf21</i> gene at its <i>XbaI</i> - <i>NdeI</i> recognition site.                                                                                                                         | This study                                                                          |

**Supplementary Table S2.** Primers used in this study.

| Name            | Primer sequence (5'-3')                                                      | Description                                                           |
|-----------------|------------------------------------------------------------------------------|-----------------------------------------------------------------------|
| <i>orf21-1</i>  | FP: Ccccatatgggtgattgcctgcgcgagagaac<br>RP: gggcttagactaggcgggtcacgccccgcttc | PCR amplification of <i>orf21</i>                                     |
| <i>aac(3)IV</i> | FP: cagcttctcaaccttgggggt<br>RP: atgatctgctctgctgtgg                         | To confirm insertion of pIB139 in <i>S. clavuligerus</i> .            |
| <i>ermE*</i>    | FP: atgctagtcgcggttgatcg                                                     | To confirm the transformation of <i>S. clavuligerus</i> with pIORF21. |
| <i>orf21-2</i>  | FP: gccggatcgtcatcaac<br>RP: cgacaggatctgactgggt                             | Amplification of <i>orf21</i> by RT-qPCR                              |
| <i>hrdB</i>     | FP: cgcggcatgctcttctt<br>RP: aggtggcgtacgtggagaac                            | Amplification of <i>hrdB</i> by RT-qPCR                               |
| <i>gcas</i>     | FP: ggtcaactggagcctgtgta<br>RP: ccgcgaacttggcatagtc                          | Amplification of <i>gcas</i> by RT-qPCR                               |
| <i>ccaR</i>     | FP: tcgcggactccatcgaccttt<br>RP: ggcggggcccttcacag                           | Amplification of <i>ccaR</i> by RT-qPCR                               |
| <i>claR</i>     | FP: cgggcggcgggttctt<br>RP: tcgtcgagcaggggttcc                               | Amplification of <i>claR</i> by RT-qPCR                               |
| <i>adpA</i>     | FP: caggtctttaccagaggaaatc<br>RP: cgaactgctcgtgaagatg                        | Amplification of <i>adpA</i> by RT-qPCR                               |
| SCLAV_4359      | FP: gtcggcgagaagatcgacat<br>RP: tgttgatgtagccggtgtcc                         | Amplification of SCLAV_4359 by RT-qPCR                                |

**Supplementary Table S3.** Normalized data for the relative gene expression

| Culture medium | Relative expression                       | <i>gcas</i> | <i>claR</i> | <i>adpA</i> |
|----------------|-------------------------------------------|-------------|-------------|-------------|
| GSPG           | $2^{(-\Delta\Delta C_t)}$                 | 1.7         | 0.9         | 1.9         |
|                | $\text{Log } 2 [2^{(-\Delta\Delta C_t)}]$ | 0.7         | -0.2        | 0.9         |
|                | $[2^{(-\Delta\Delta C_t)}]$               | 1.4         | 0.005       | 1.4         |
| ISP            | $\text{Log } 2 [2^{(-\Delta\Delta C_t)}]$ | 0.5         | -7.7        | 0.5         |

**Supplementary Figure S1.** Ammonium production during *Streptomyces clavuligerus* batch culture. (a) GSPG medium and (b) ISP medium. *S. clavuligerus*/ pIORF21(◆) and *S. clavuligerus*/pIB139(■). Each value is the mean of three flask replicates (n=3). Errorbars indicate standard deviation values.

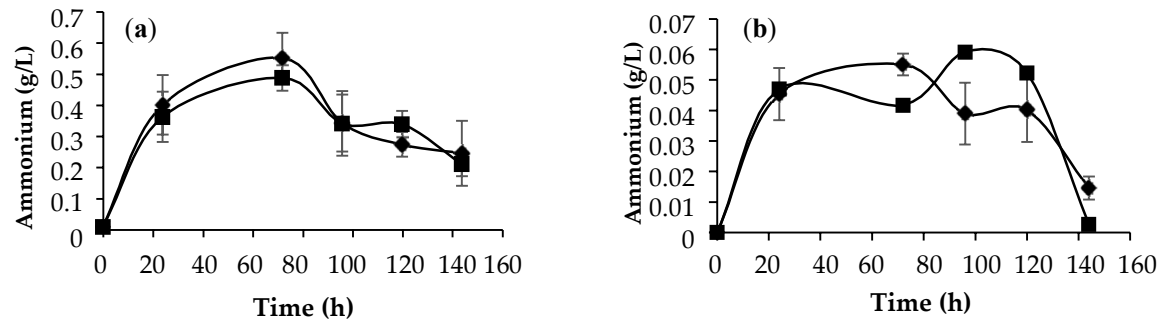

**Supplementary Figure S2.** Phylogenetic tree of homologous proteins to *Streptomyces clavuligerus* ORF21 protein. Homologous proteins were taken from NCBI BLAST ([http:// www.ncbi.nlm.nih.gov/BLAST/](http://www.ncbi.nlm.nih.gov/BLAST/) (accessed on 06 November 2021) search. In blue, the clustering for CA producer. The percentage of replicate trees in which the associated taxa clustered together in the bootstrap test (1.000.000 replicates) are shown next to the branches.

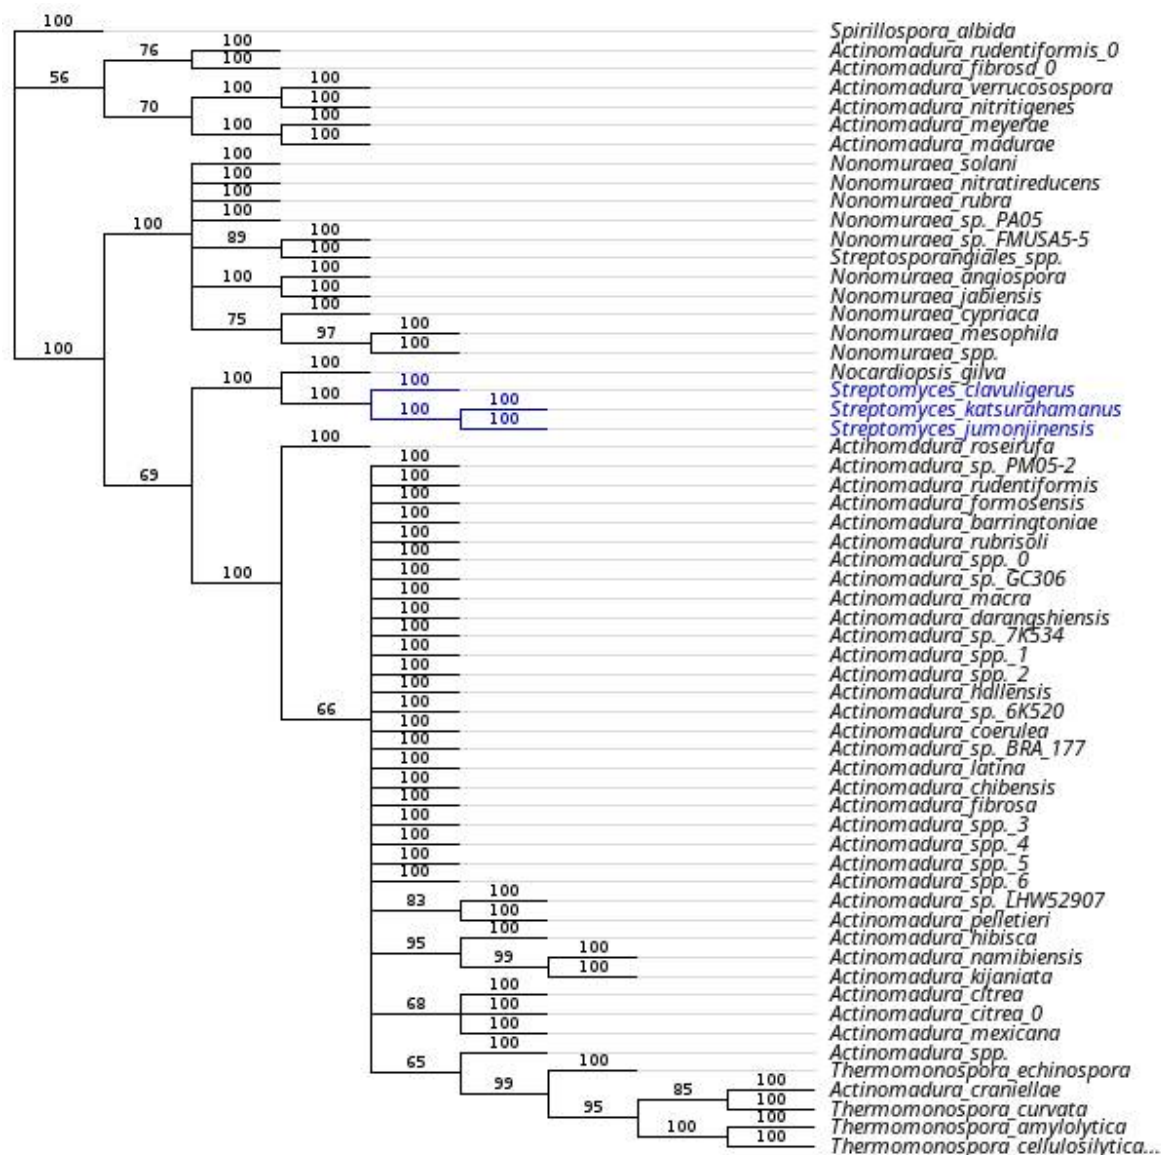

**Supplementary Figure S3.** Phylogenetic tree of some ECF sigma factors and ORF21. The GenBank accession numbers for the protein sequences used in the analysis are included with the names of each species. The clustering for SigL sigma factors is show in red. The percentage of replicate trees in which the associated taxa clustered together in the bootstrap test (1000 replicates) are shown next to the branches.

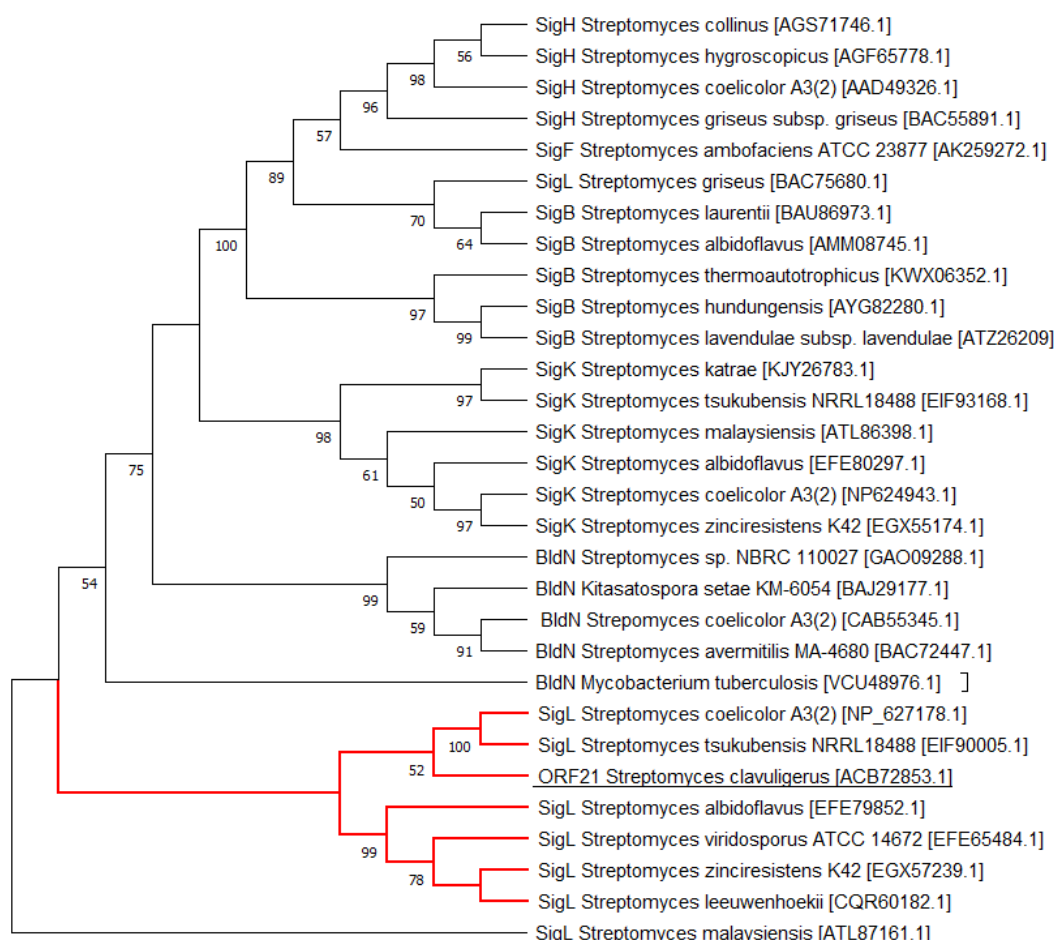

**Supplementary Figure S4.** Effects of *orf21* overexpression on the transcription of genes related to CA biosynthesis. RT-qPCR results for *S. clavuligerus*/pIORF21 compared to *S. clavuligerus* wild-type strain in ISP. The RNA sample were taken at the peak of maximum CA production for both strains. The error bars indicate the standard error. Normalized data for the relative gene expression is shown in the table below.

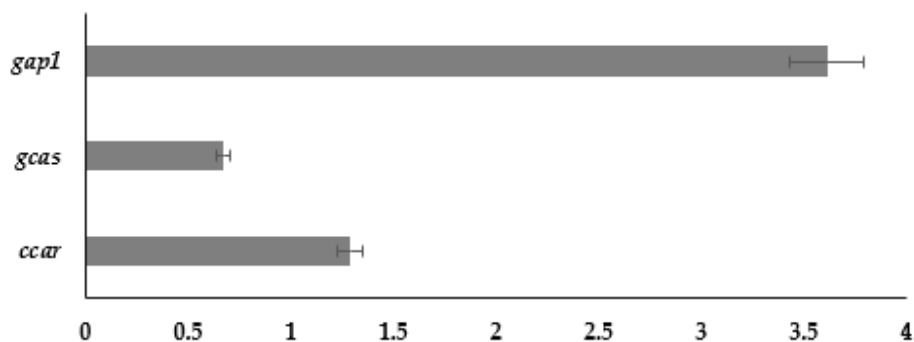

| Log 2 fold change |                                             |             |             |             |
|-------------------|---------------------------------------------|-------------|-------------|-------------|
| Culture medium    | Relative expression                         | <i>gap1</i> | <i>gcas</i> | <i>ccar</i> |
| ISP               | $2^{(-\Delta\Delta C_t)}$                   | 12.3        | 1.6         | 2.4         |
|                   | $\text{Log } 2 [ 2^{(-\Delta\Delta C_t)} ]$ | 3.6         | 0.7         | 1.3         |

## References

1. Wilkinson, C.J.; Hughes-Thomas, Z.A.; Martin, C.J.; Bohm, I.; Mironenko, T.; Deacon, M.; Wheatcroft, M.; Wirtz, G.; Staunton, J.; Leadlay, P.F. Increasing the Efficiency of Heterologous Promoters in Actinomycetes. *J. Mol. Microbiol. Biotechnol.* **2002**, *4*, 417–426.
